# Supplementary material
Source: PubMed Central journal article supplement (PMC3750686)
Supplement: cn400092v_si_001.pdf [file cn400092v_si_001.pdf]

## Supplemental Figures

**Figure S1.** The 2D-IR spectrum of unlabeled amyloid fibrils at  $T=0$  fs illustrating the potential for absorptions from groups in the peptide other than  $^{13}\text{C}=^{18}\text{O}$ . The black square ( $1500\text{-}1550\text{ cm}^{-1}$ ) outlines the region where amide II' absorptions occur. The area within the red square ( $1550\text{-}1600\text{ cm}^{-1}$ ) is scaled 20-fold in the inset, demonstrating the absence of absorption due to arginine side chains.

**Figure S2.** Comparison of ICLS (inverse of central line slope) and IS (inverse of the nodal line slope) calculations in 4-year old A30\* fibrils at waiting times  $T = 0, 250$  fs, and 1500 fs. (a) Central lines are identified by determining the value of  $\omega_t$  where spectral intensity is maximal for values of  $\omega_r$ ,<sup>31</sup> and are illustrated by black lines. Nodal lines are identified by determining the value of  $\omega_t$  where spectral intensity is zero between the negative and positive transitions for values of  $\omega_r$ . (b) The decay of ICLS and IS values for the  $1583\text{ cm}^{-1}$  transition of A30\* exhibited time constants of  $1.2 \pm 0.3$  ps and  $1.3 \pm 0.3$  ps, respectively, indicating that the two methods yield similar results for the spectral diffusion rate of a single transition. In some 2D IR spectra, lineshape distortion may arise due to peak overlap. This overlap can cause uncertainty in the determination of the spectral diffusion rate using methods described here (see Kwak et al., J.Chem.Phys. 128 (20), 2008). This distortion is particularly severe at early waiting times when lineshapes are elongated along the diagonal, requiring cautious measurement and interpretation. At longer waiting times, spectral diffusion improves peak resolution, and ICLS and IS may be applied directly. The two methods yielded similar results for the spectral diffusion rate in this study.

**Figure S3.** Off-diagonal crosspeaks in a 2D-IR photon echo experiment have positive and negative components that correspond to the on-diagonal absorption peaks, with a negative crosspeak at low  $\omega_t$  and a positive crosspeak at high  $\omega_t$ . The biphasic character of L17\*, V18\*, G29\* and A30\* crosspeaks are clearly seen with an expanded scale. That character is not present in an expanded-scale spectrum from F19\*. For G29\*, the positive crosspeak is obscured by a negative crosspeak at higher  $\omega_t$ . For V36\*, crosspeak appears between the  $1590\text{ cm}^{-1}$  transition and the weak transition at  $\sim 1580\text{ cm}^{-1}$  at longer waiting time ( $T = 3000$  fs).

**Figure S4.** Electron micrographs of 4-year-old L17\* (left) and V36\* (right) fibrils, negatively stained with 1% aqueous uranyl nitrate.

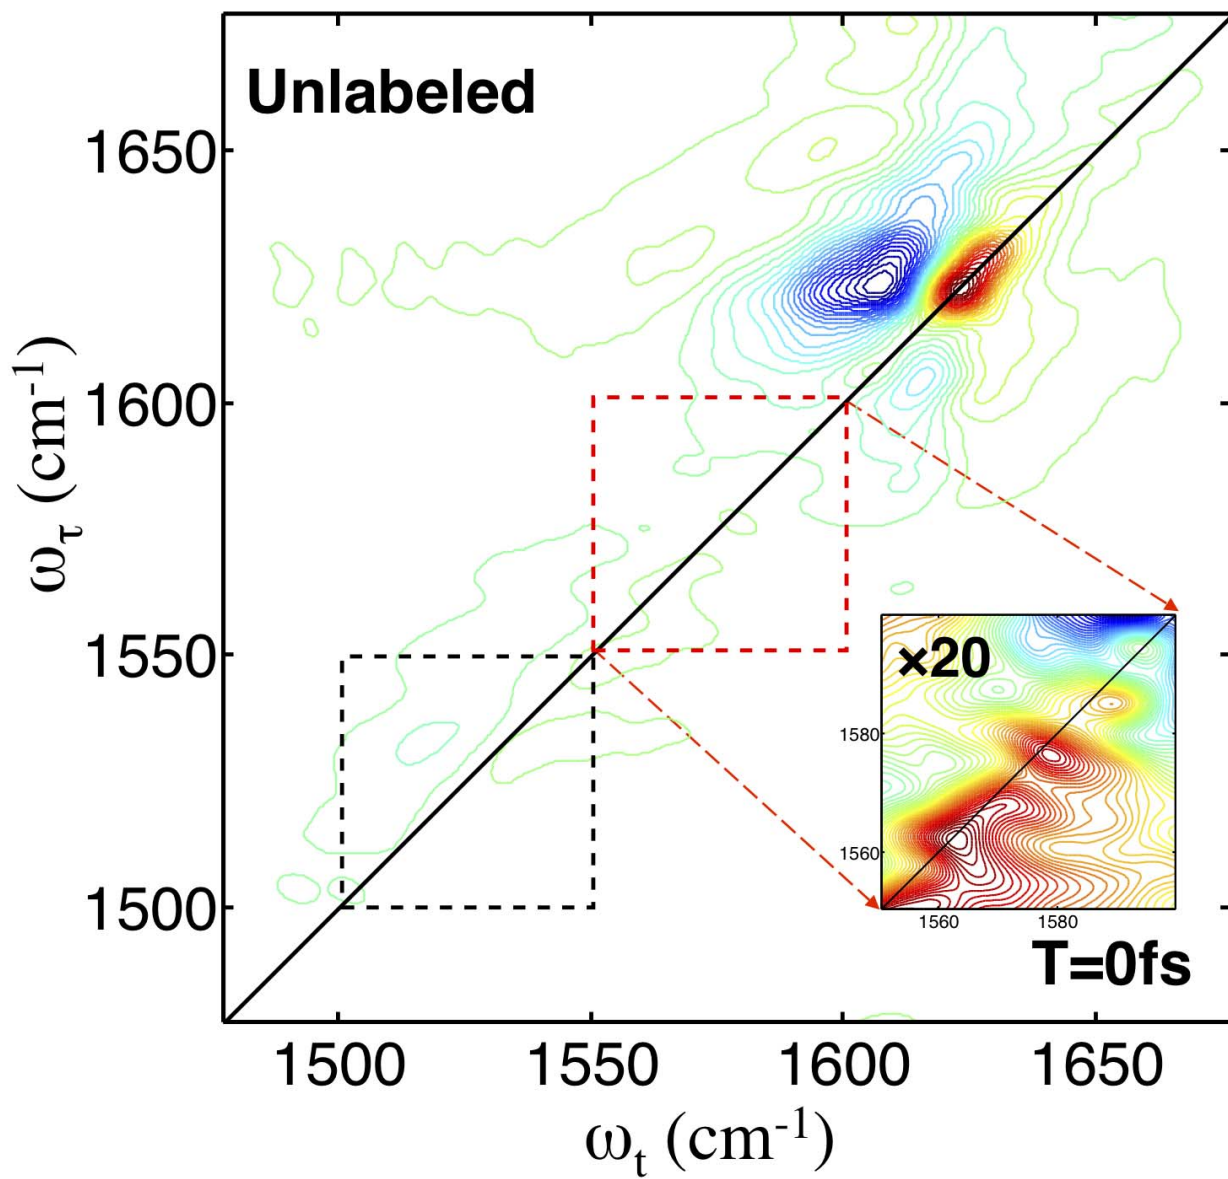

Figure S1

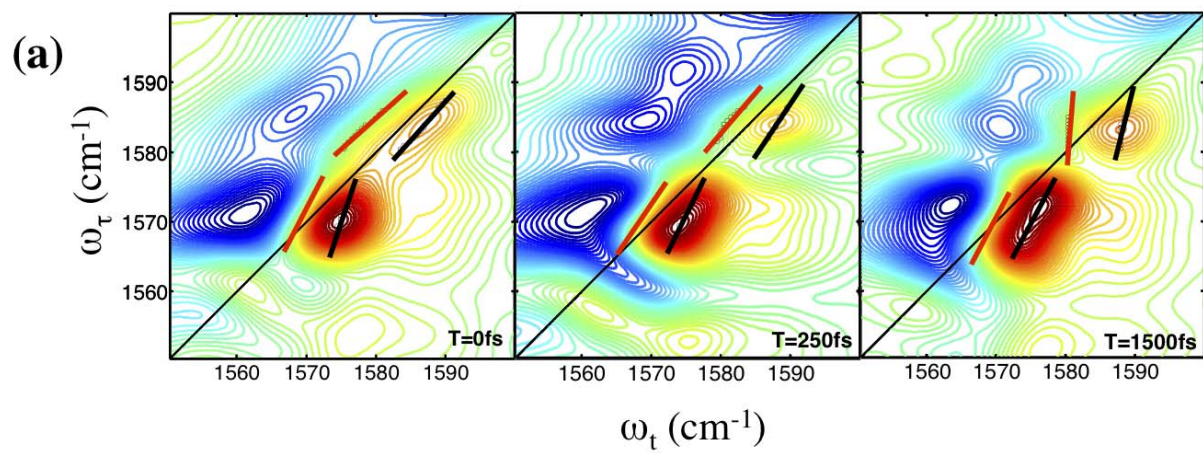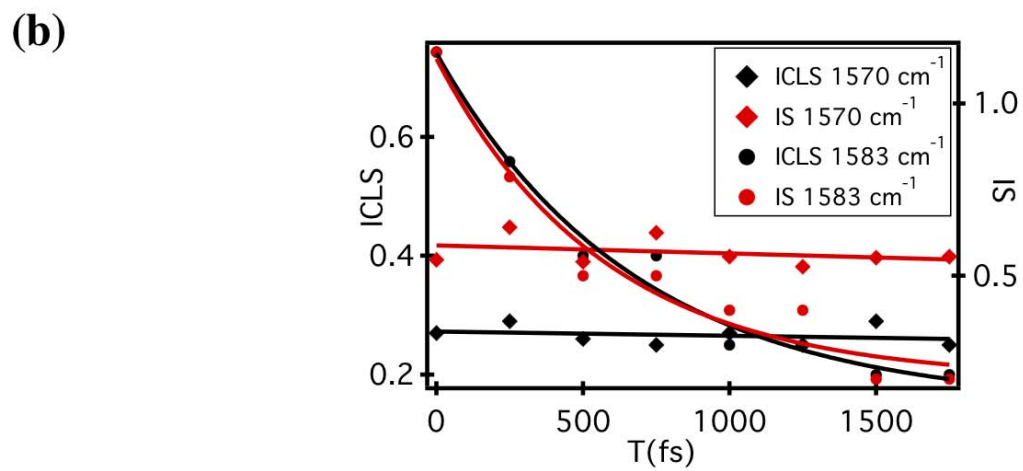

Figure S2

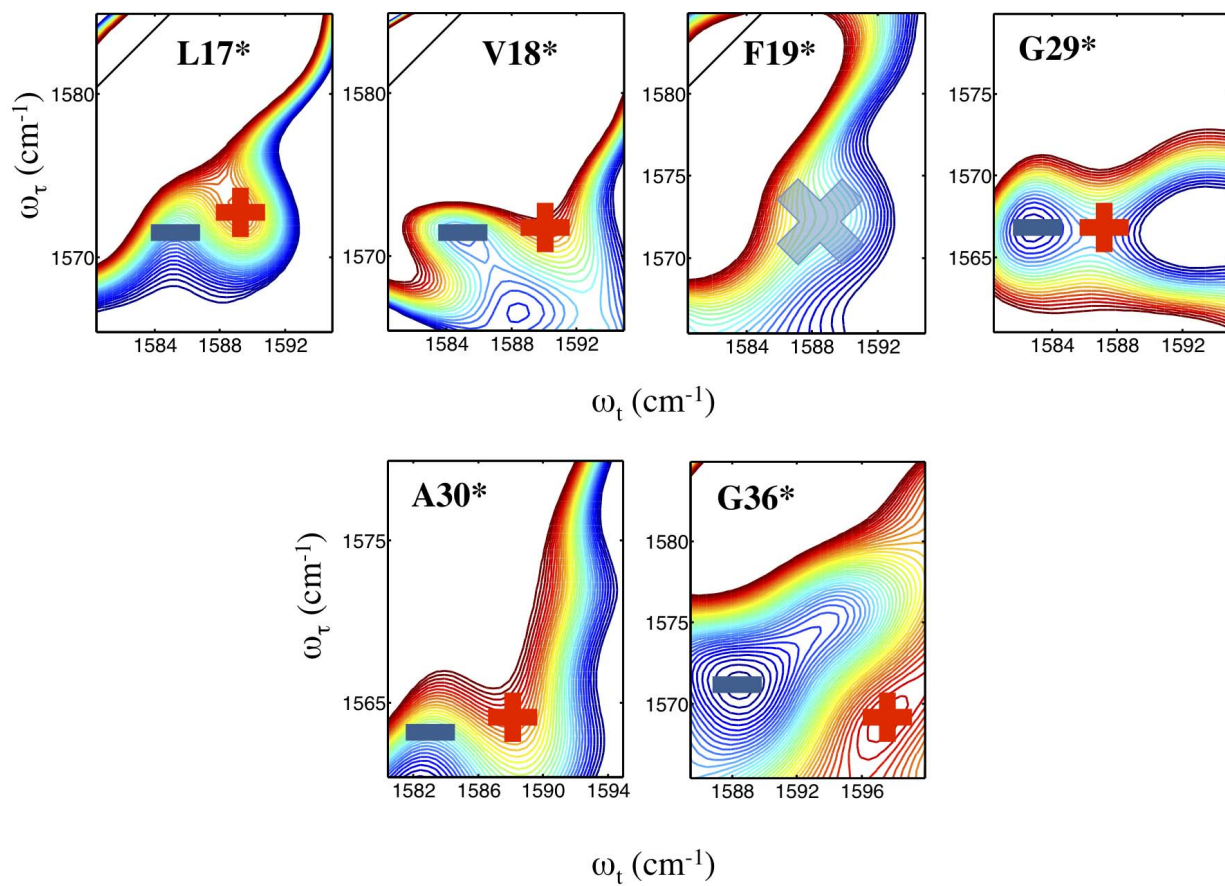

Figure S3

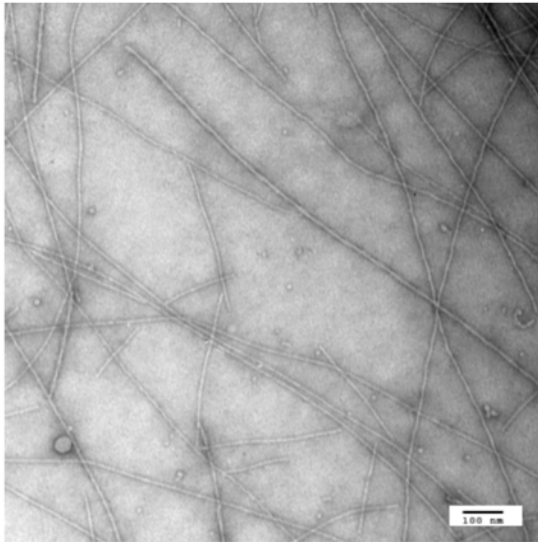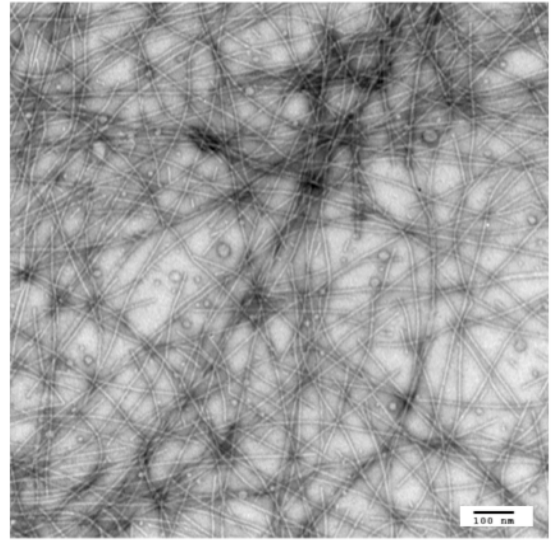

Figure S4
